# Supplementary material for: Contextual Targeting in mHealth Apps: Harnessing Weather Information and Message Framing to Increase Physical Activity
Source: Atypon-hosted journal article supplement (doi:10.1287/isre.2020.0119), 2023-08-08
Supplement: isre.2020.0119.sm1.pdf [file isre.2020.0119.sm1.pdf]

## Appendix

**Table A1. Descriptive statistics and randomization check for the intervention groups of Study 1**

| Group                                  | Female (%) | Age   | Weight (kg) | Height (cm) | Previous week steps walked |
|----------------------------------------|------------|-------|-------------|-------------|----------------------------|
| Neutral                                | 63.72      | 47.59 | 63.69       | 163.83      | 43,690.81                  |
| Gain                                   | 64.28      | 47.56 | 63.37       | 164.85      | 43,447.77                  |
| Loss                                   | 65.44      | 47.45 | 62.91       | 164.59      | 43,009.86                  |
| <i>t</i> -statistics of Neutral – Gain | -0.184     | 0.047 | 0.301       | -0.823      | 0.130                      |
| <i>t</i> -statistics of Neutral – Loss | -0.523     | 0.179 | 0.787       | -0.795      | 0.385                      |

Note: \*  $p < 0.1$ , \*\*  $p < 0.05$ , \*\*\*  $p < 0.01$ .

**Table A2. Linear Probability Model (LPM) and Ordinary Least Squares (OLS) regression analysis result of Study 1**

| DV:      | (1)                   | (2)                  |
|----------|-----------------------|----------------------|
|          | Achievement           | # of Steps           |
| Gain     | 0.0909***<br>(0.0275) | 0.228***<br>(0.0443) |
| Loss     | 0.104***<br>(0.0232)  | 0.204***<br>(0.0414) |
| Constant | 0.133<br>(0.247)      | 1.021<br>(0.874)     |
| N        | 1,248                 | 1,248                |

Note: Baseline group is the neutral intervention (no-framing) group. The same control variables are included as in Table 3. Location and day fixed effects are included. Robust clustered standard errors are shown in parentheses. \*  $p < 0.1$ , \*\*  $p < 0.05$ , \*\*\*  $p < 0.01$ .

**Table A3. Linear Probability Model (LPM) regression analysis result with time-location fixed effects**

| DV:          | (1)                    |
|--------------|------------------------|
|              | Achievement            |
| Sunny        | -0.0315<br>(0.0259)    |
| Loss         | -0.0543***<br>(0.0209) |
| Sunny × Loss | 0.124***<br>(0.0202)   |
| Constant     | 0.0201<br>(0.0584)     |
| N            | 5,956                  |

Note: The same control variables are included as in Table 3. Individual, location, day, and day × location fixed effects are included. Robust clustered standard errors are shown in parentheses. \*  $p < 0.1$ , \*\*  $p < 0.05$ , \*\*\*  $p < 0.01$ .

**Table A4. Logit and Probit regression analysis result**

| DV:          | (1) Logit            | (2) Probit           |
|--------------|----------------------|----------------------|
|              | Achievement          | # of Steps           |
| Sunny        | -0.747<br>(0.616)    | -0.912*<br>(0.470)   |
| Loss         | -0.786***<br>(0.294) | -0.869***<br>(0.229) |
| Sunny × Loss | 1.559***<br>(0.286)  | 1.808***<br>(0.232)  |
| N            | 5,956                | 5,956                |

Note: We log-transform the walking steps to adjust the skewness of data. The same control variables are included as in Table 3. Individual, location, and day fixed effects are included. Robust clustered standard errors are shown in parentheses. \*  $p < 0.1$ , \*\*  $p < 0.05$ , \*\*\*  $p < 0.01$ .

**Table A5. Linear Probability Model (LPM) regression analysis result**

| DV:          | (1) Discard outliers  | (2) Discard observations experienced radical weather change |
|--------------|-----------------------|-------------------------------------------------------------|
|              | Achievement           | Achievement                                                 |
| Sunny        | -0.0315<br>(0.0259)   | 0.0321*<br>(0.0176)                                         |
| Loss         | -0.0500**<br>(0.0209) | -0.0515**<br>(0.0213)                                       |
| Sunny × Loss | 0.120***<br>(0.0202)  | 0.123***<br>(0.0212)                                        |
| Constant     | 0.00531<br>(0.0592)   | 0.0183<br>(0.0599)                                          |
| N            | 5,916                 | 5,592                                                       |

Note: The same control variables are included as in Table 3. Individual, location, and day fixed effects are included. Robust clustered standard errors are shown in parentheses. \*  $p < 0.1$ , \*\*  $p < 0.05$ , \*\*\*  $p < 0.01$ .

**Table A6. Difference-in-difference (DID) analysis results of intervention effect on the post-experiment period in sunny weather**

| DV:        | # of Steps walked during the post-experiment period |                      |                      |                      |                      |                      |                      |
|------------|-----------------------------------------------------|----------------------|----------------------|----------------------|----------------------|----------------------|----------------------|
| Weather:   | Sunny                                               |                      |                      |                      |                      |                      |                      |
| Period:    | 1 Day (Treat)                                       | 2 Day                | 3 Days               | 4 Days               | 5 Days               | 6 Days               | 7 Days               |
| Loss×After | 0.407***<br>(0.091)                                 | 0.410***<br>(0.105)  | 0.437***<br>(0.133)  | 0.381***<br>(0.100)  | 0.392***<br>(0.117)  | 0.335**<br>(0.156)   | 0.133*<br>(0.076)    |
| Constant   | 7.742***<br>(0.0458)                                | 7.758***<br>(0.0644) | 7.623***<br>(0.0622) | 7.469***<br>(0.0579) | 7.544***<br>(0.0607) | 7.713***<br>(0.0630) | 7.869***<br>(0.0499) |
| N          | 5,952                                               | 5,952                | 5,952                | 5,952                | 5,952                | 5,952                | 5,952                |

Note: We log-transform the walking steps to adjust the skewness of data. The same control variables are included as in Table 3. Individual, location, and day fixed effects are included. Robust clustered standard errors are shown in parentheses. \*  $p < 0.1$ , \*\*  $p < 0.05$ , \*\*\*  $p < 0.01$

**Table A7. Difference-in-difference (DID) analysis results of intervention effect on the post-experiment period in cloudy weather**

| DV:        | # of Steps walked during the post-experiment period |                      |                      |                      |                      |                      |                      |
|------------|-----------------------------------------------------|----------------------|----------------------|----------------------|----------------------|----------------------|----------------------|
| Weather:   | Cloudy                                              |                      |                      |                      |                      |                      |                      |
| Period:    | 1 Day (Treat)                                       | 2 Day                | 3 Days               | 4 Days               | 5 Days               | 6 Days               | 7 Days               |
| Loss×After | -0.342***<br>(0.075)                                | -0.227***<br>(0.070) | -0.203**<br>(0.081)  | -0.242***<br>(0.061) | -0.141**<br>(0.062)  | -0.120*<br>(0.069)   | 0.055<br>(0.083)     |
| Constant   | 7.202***<br>(0.050)                                 | 7.698***<br>(0.0452) | 7.652***<br>(0.0569) | 7.706***<br>(0.0241) | 7.763***<br>(0.0408) | 8.134***<br>(0.0415) | 7.291***<br>(0.0483) |
| N          | 5,956                                               | 5,956                | 5,956                | 5,956                | 5,956                | 5,956                | 5,956                |

Note: We log-transform the walking steps to adjust the skewness of data. The same control variables are included as in Table 3. Individual, location, and day fixed effects are included. Robust clustered standard errors are shown in parentheses. \*  $p < 0.1$ , \*\*  $p < 0.05$ , \*\*\*  $p < 0.01$

**Table A8. Linear Probability Model (LPM) regression analysis result by parks accessibility**

| DV:                        | (1) High park accessibility | (2) Low park accessibility |
|----------------------------|-----------------------------|----------------------------|
|                            | Achievement                 | Achievement                |
| Sunny ( $\beta_1$ )        | -0.00113<br>(0.0292)        | -0.0250<br>(0.0267)        |
| Loss ( $\beta_2$ )         | -0.0652*<br>(0.0350)        | -0.0419*<br>(0.0233)       |
| Sunny × Loss ( $\beta_3$ ) | 0.140***<br>(0.0350)        | 0.132***<br>(0.0231)       |
| Constant                   | 0.00279<br>(0.0908)         | 0.00773<br>(0.0558)        |
| N                          | 2,680                       | 3,276                      |

Note: The same control variables are included as in Table 3. Individual, location, and day fixed effects are included. Robust clustered standard errors are shown in parentheses. \*  $p < 0.1$ , \*\*  $p < 0.05$ , \*\*\*  $p < 0.01$ .
